# Supplementary material
Source: HighWire-hosted journal article supplement (https://www.cmajopen.ca/highwire/filestream/88088/field_highwire_adjunct_files/0/2021-0323-1-at.pdf)
Supplement: 2021-0323-1-at.pdf [file 2021-0323-1-at.pdf]

**The Impact of Shifting Demographics, Variants of Concern, and Vaccination on Outcomes During the First Three Covid-19 Waves in Alberta and Ontario: Retrospective Cohort Study  
(McAlister et al.)**

**Appendix 1. Covariate definitions and data sources**

| Covariate                                                                                                                                | ICD-10-CA [or Canadian Classification of Health Intervention (CCI)] Codes                                                                                                                                                                                                               | Data sources                                           |
|------------------------------------------------------------------------------------------------------------------------------------------|-----------------------------------------------------------------------------------------------------------------------------------------------------------------------------------------------------------------------------------------------------------------------------------------|--------------------------------------------------------|
| Chronic obstructive lung disease (COPD)/asthma                                                                                           | J40-J45                                                                                                                                                                                                                                                                                 | DAD                                                    |
| Other chronic lung disease (non-COPD/asthma)                                                                                             | J46, J47, J60-J67, I278, I279, J684, J701, J703                                                                                                                                                                                                                                         | DAD                                                    |
| Congestive heart failure                                                                                                                 | I43, I50, I099, I110, I130, I132, I255, I420, I425-I429, P290                                                                                                                                                                                                                           | DAD                                                    |
| Hypertension                                                                                                                             | I10-I13, I15                                                                                                                                                                                                                                                                            | DAD                                                    |
| Diabetes mellitus                                                                                                                        | E10-E14                                                                                                                                                                                                                                                                                 | DAD                                                    |
| Coronary artery disease (previous myocardial infarction, coronary artery bypass graft surgery, percutaneous coronary intervention/stent) | I20-I25 [or CCI 1I150, 1I176]                                                                                                                                                                                                                                                           | DAD, SDS (for procedures)                              |
| Peripheral vascular disease                                                                                                              | I70, I71, I731, I738, I739, I771, I790, I792, K551, K558, K559, Z958, Z959                                                                                                                                                                                                              | DAD                                                    |
| Cerebrovascular disease (previous stroke/transient ischemic attack)                                                                      | G45, G46, I60-I69, H340                                                                                                                                                                                                                                                                 | DAD                                                    |
| Atrial fibrillation/flutter                                                                                                              | I48                                                                                                                                                                                                                                                                                     | DAD                                                    |
| Ventricular arrhythmias                                                                                                                  | I472, I49                                                                                                                                                                                                                                                                               | DAD                                                    |
| Renal disease                                                                                                                            | I120, I131, N032-N037, N052-N057, N18, N19, N250, Z490, Z491, Z492, Z940, Z992                                                                                                                                                                                                          | DAD                                                    |
| Cancer                                                                                                                                   | C00-C26, C30-C34, C37-C39, C40, C41, C43, C45-C49, C50-C58, C60-C85, C88, C90-C97                                                                                                                                                                                                       | DAD                                                    |
| Peptic ulcer disease                                                                                                                     | K25-K28                                                                                                                                                                                                                                                                                 | DAD                                                    |
| Liver disease                                                                                                                            | B18, I850, I859, I864, I982, K700, K701-K704, K709, K711, K713-K715, K717, K721, K729, K73, K74, K760, K762-K769, Z944                                                                                                                                                                  | DAD                                                    |
| Dementia                                                                                                                                 | F00-F03, F051, G30, G311                                                                                                                                                                                                                                                                | DAD                                                    |
| Vaccination status                                                                                                                       | At the time of SARS-CoV-2 test:<br>Fully vaccinated = ≥ 2 weeks after second dose of approved COVID-19 vaccine<br>Partially vaccinated = ≥ 2 weeks after first dose of approved COVID-19 vaccine<br>Non-vaccinated = No dose or < 2 weeks after first dose of approved COVID-19 vaccine | Alberta Health Services,<br>Ontario Ministry of Health |

Abbreviations: DAD, Canadian Institute for Health Information Discharge Abstract Database; SDS, Canadian Institute for Health Information Same Day Surgery Database.

Appendix 1, as supplied by authors. Appendix to: McAlister FA, Nabipoor M, Chu A, et al. The impact of shifting demographics, variants of concern and vaccination on outcomes during the first 3 COVID-19 waves in Alberta and Ontario: a retrospective cohort study. *CMAJ Open* 2022. DOI:10.9778/cmajo.20210323. Copyright © 2022 The Author(s) or their employer(s). To receive this resource in an accessible format, please contact us at [cmajgroup@cmaj.ca](mailto:cmajgroup@cmaj.ca).
